# Supplementary material
Source: publisher site journal article supplement (https://www.spandidos-publications.com/4045/downloadSupplementary)
Supplement: Supplementary file 1 [file downloadSupplementary]

## Sheet: BAF complex
Table SVI. BAF complex.
The study of Selvanathan S, et al (PMID: 31392992) is nicely showing the strong role of the BAF complex in Ewing sarcoma.
Many family members of the BAF complex are DS in this study and expose the modified cancer biology network.
JC junction count approach.
						BAF complex members
		Search for BAF complex members				and their synonyms (GeneCards based)
BAF complex
Gene-Names						ARID1A	BAF250
		Blue, left: present in B, H1/2, G1/2 (46 %, blue boxes)				ARID1A	BAF250A
ACTB		gene, exon start position				ARID1A	C1orf4
ACTG1		B	Differences of SP to NSP.			ARID1A	OSA1
ACTL6A		SMARCB1_23800943				ARID1A	SMARCF1
ACTL6B		SMARCB1_23791755				ACTL6A	ACTL6
ARID1A		H1,G1	Differences of SP,NSP to ES1.			ACTL6B	BAF53B
ARID1B		ACTG1_81511187				ACTL6A	BAF53
SMARCA2		SMARCA4_11039457				ACTL6A	BAF53A
SMARCA4		SMARCA4_11058254				ACTL6A	INO80K
SMARCB1		SMARCB1_23791755				SMARCA2	BAF190B
SMARCC1		SMARCB1_23791755				SMARCA2	BRM
SMARCC2		SMARCE1_40642454				SMARCA2	SNF2A
SMARCD1		H2,G2	Differences of SP,NSP to ES2.			SMARCA2	SNF2L2
SMARCE1		ACTB_5529534				SMARCA4	BAF190A
		ACTG1_81511187				SMARCB1	BRG1
		ACTL6A_179575402				SMARCA4	SNF2B
		SMARCA4_11058254				SMARCA4	SNF2L4
		SMARCE1_40642454				ACTG1	ACTG
		SMARCE1_40630207				SMARCB1	BAF47
						SMARCB1	INI1
		Red, left: present in D, B2 (46 %, red boxes)				SMARCB1	SNF5L1
ACTB						ARID1B	BAF250B
ACTG1		D	Differences of SP to MSC.			ARID1B	DAN15
ACTL6A		ACTG1_81511187				ARID1B	KIAA1235
ACTL6B		ARID1B_157174846				ARID1B	OSA2
ARID1A		SMARCA2_2170418				SMARCC2	BAF170
ARID1B		SMARCA2_2170418				SMARCC1	BAF155
SMARCA2		SMARCB1_23791755				SMARCE1	BAF57
SMARCA4		B2	Differences of NSP to MSC.			SMARCD1	BAF60A
SMARCB1		ACTB_5528280
SMARCC1		SMARCB1_23800943
SMARCC2		SMARCB1_23800943
SMARCD1		SMARCB1_23791755
SMARCE1		SMARCC2_56180976
